# Supplementary material
Source: Springer Nature journal article supplement (https://www.springermedizin.de/resource/supplementary/12885_2013_4542_MOESM2_ESM.pdf/9466660)

**PETCT NEGATIVE**

CT

PETCT

PET

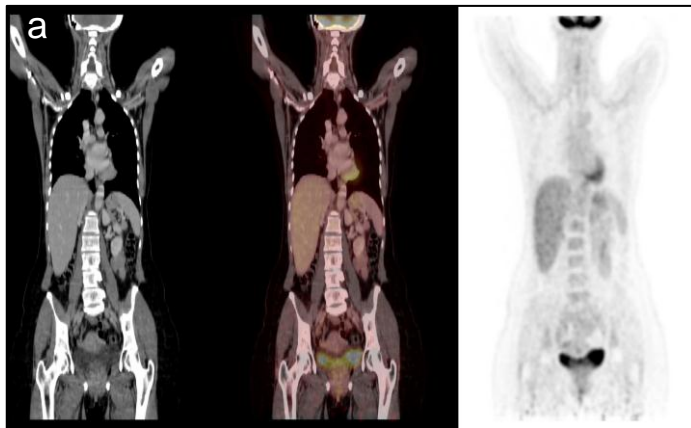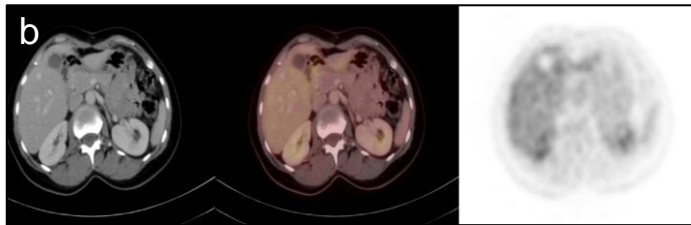

CA15-3 = 45.3 UI/mL

**PETCT POSITIVE**

CT

PETCT

PET

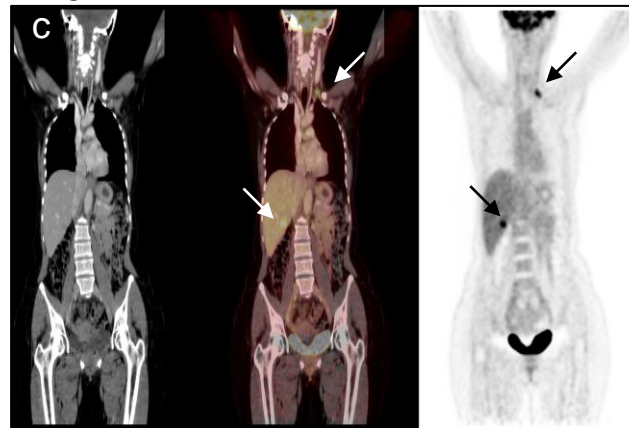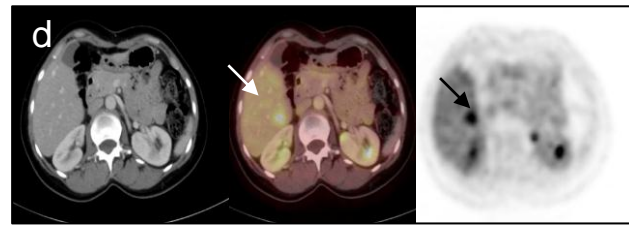

CA15-3 = 116.8 UI/mL

Supplement: MOESM2 [file 9466660]
